# Supplementary material for: Adaptation of the human aryl hydrocarbon receptor to sense microbiota-derived indoles
Source: PubMed Central journal article supplement (PMC4522678; doi:10.1038/srep12689), 2015-08-03
Supplement: srep12689-s1.pdf [file srep12689-s1.pdf]

## SUPPLEMENTARY MATERIALS AND METHODS, TABLE, FIGURES AND LEGENDS

### ‘Adaptation of the human aryl hydrocarbon receptor to sense microbiota-derived indoles’

Troy D. Hubbard, Iain A. Murray, William H. Bisson, Tejas S. Lahoti, Krishne Gowda, Shantu G. Amin, Andrew D. Patterson and Gary H. Perdew

## MATERIALS AND METHODS

**Indole Recrystallization/Purification:** Commercial indole was purified by recrystallization using chloroform/petroleum ether and the pure compound was characterized by  $^1\text{H}$  and  $^{13}\text{C}$  NMR.  $^1\text{H}$  NMR (500 MHz,  $\text{CDCl}_3$ )  $\delta$  6.62 (s, 1H), 7.14-7.17 (t, 1H,  $J = 7.5$  Hz), 7.20-7.26 (m, 2H), 7.40 (d, 1H,  $J = 8$  Hz), 7.68 (d, 1H,  $J = 7.5$  Hz), 8.09 (s, 1H);  $^{13}\text{C}$  NMR (500 MHz,  $\text{CDCl}_3$ )  $\delta$  102.66, 111.04, 119.85, 120.75, 122.02, 124.13, 127.89, 135.81; mp = 52-54 °C. Further, the purity was confirmed by reverse-phase HPLC using 4.6 mm  $\times$  25 cm vydac-C18 column eluted with a gradient from 30 to 100%  $\text{CH}_3\text{OH}$  in 30 min, the flow rate was 1 mL/min, and monitored at 254 nm, RT = 14.65 min. The purity level was > 99%.

**Electrophoretic Mobility Shift Assay:** Gel retardation assays were performed using *in vitro* translated human AHR, mouse AHR and ARNT protein generated via TnT® Coupled Reticulocyte Lysate Systems according to manufacturer’s protocol (Promega, Madison, WI). Human AHR *in vitro* translations were supplemented with sodium molybdate to a final concentration of 1.25 mM to enhance stability of the receptor/HSP90 complex. Four microliters each of AHR and ARNT proteins were combined with 1.5  $\mu\text{L}$  of HEDG buffer (25 mM HEPES, 1 mM EDTA, 10 mM sodium molybdate, and 10% glycerol), with the addition of indicated treatments (0.5  $\mu\text{L}$ ) and incubated at room temperature for 15 min. Following treatment incubation,  $2 \times 10^6$  cpm of  $^{32}\text{P}$ -DRE oligonucleotides were added to each reaction and incubated at room temperature for an additional 15 min. After addition of 2  $\mu\text{L}$  of 0.25% xylene cyanol in 20% (w/v) Ficoll to the reaction mixture, samples were loaded onto a 6% non-denaturing DNA retardation gel (Invitrogen, Carlsbad, CA) and separated by electrophoresis. The gels were fixed in a 7:1:1:1 water:methanol:acetic acid:glycerol solution for 20 min, dried for 60 min, and then subjected to autoradiography for analysis.

**Chimpanzee AHR cDNA synthesis:** The codon-optimized chimpanzee AHR cDNA was synthesized by GenScript (Piscataway, NJ) and cloned into the HindIII and XhoI sites of pcDNA3, a mammalian expression vector.

## Real time PCR Primers

### Human

*CYP1A1*-F-5'-TAC CTC AGC CAC CTC CAA GAT-3'  
*CYP1A1*-R-5'-GAG GTC TTG AGG CCC TGA TT-3'  
*CYP1B1*-F-5'-TGC CTG TCA CTA TTC CTC ATG CCA -3'  
*CYP1B1*-R-5'-ATC AAA GTT CTC CGG GTT AGG CCA -3'  
*AHR*-F-5'-GAA GAT GGT GAT GGG ATT TC-3'  
*AHR*-R-5'-GAA GGT GAA GGT CGG AGT -3'  
*IL6*-F-5'-AAA TTC GGT ACA TCC TCG ACG-3'  
*IL6*-R-5'-AGT GCC TCT TTG CTG CTT TCA -3'  
*L13A*-F-5'-CCT GGA GGA GAA GAG GAA AGA GA-3'  
*L13A*-R-5'-GAG GAC CTC TGT GTA TTT GTC AA -3'

### Mouse

*Cyp1a1*-F-5'-CTC TTC CCT GGA TGC CTT CAA-3'  
*Cyp1a1*-R-5'-GGA TGT GGC CCT TCT CAA ATG -3'  
*Cyp1b1*-F-5'- GCT AGC CAG CAG TGT GAT GAT ATT-3'  
*Cyp1b1*-R-5'-GGT TAG CCT TGA AAT TGC ACT GAT -3'  
*Ahr*-F-5'-GCG TCA GCT ACC TGA GGG CCA-3'  
*Ahr*-R-5'-GGG CCA TGG GCT TCG TCC AC-3'  
*L13a*-F-5'-TTC GGC TGA AGC CTA CCA GAA AGT-3'  
*L13a*-R-5'-GCA TCT TGG CCT TTT TCC GTT-3'

### mCcl20 3.1kb DRE Oligo EMSA Sequence

*Ccl20*-3.1kb DRE-F-5'-TTG TGT GTG TGC GTG TGT GCG TGT GTT AC-3'  
*Ccl20*-3.1kb DRE-R-5'-TGT AAC ACA CGC ACA CAC GCA CAC ACA C-3'

**Supplementary Table 1.** Surface energy of binding ( $\Delta H$ , kcal/mol) for 3MI and IND molecules into the mouse and human AHR PASB after second round of docking.

|               | <b>Mouse</b> | <b>Human</b> |
|---------------|--------------|--------------|
| <b>Indole</b> | -0.09        | -0.58        |
| <b>3MI</b>    | -0.37        | -1.76        |

## Supplementary Figures

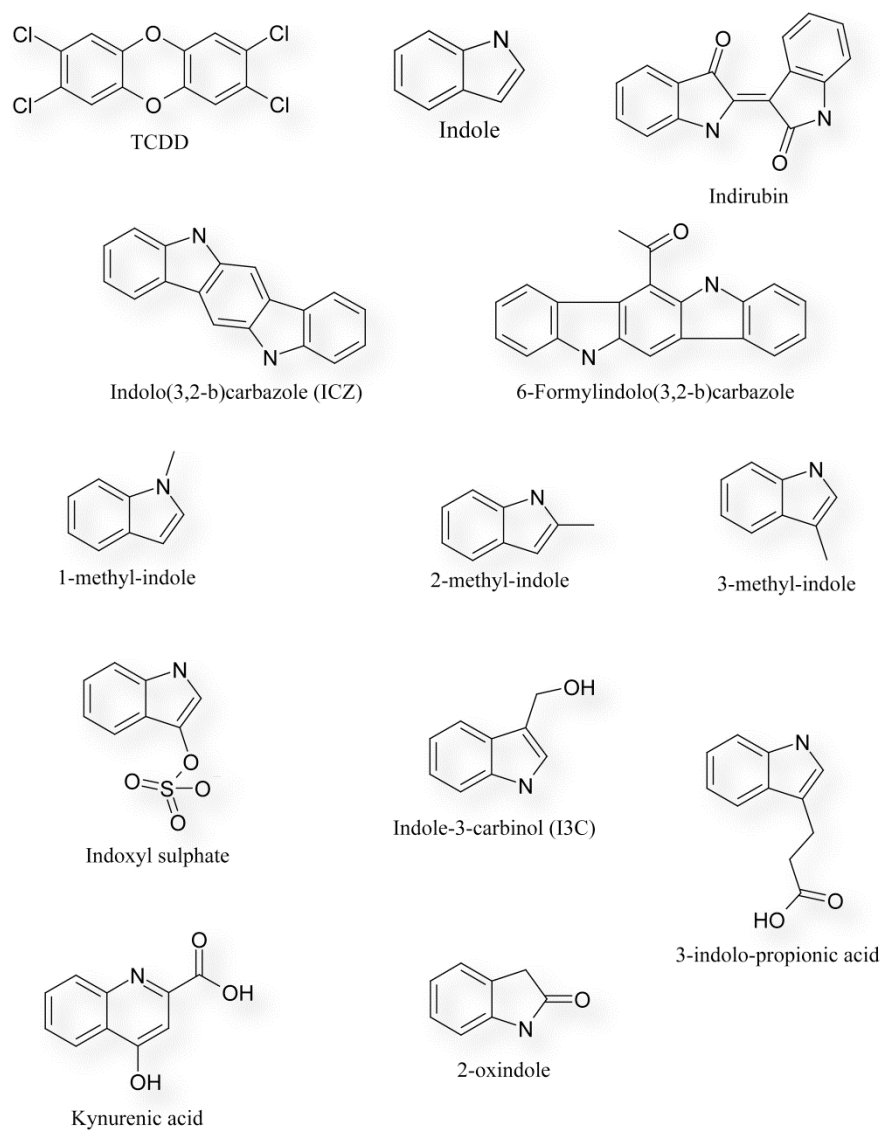

**Figure S1:** Molecular structure of AHR Ligands and Indoles.

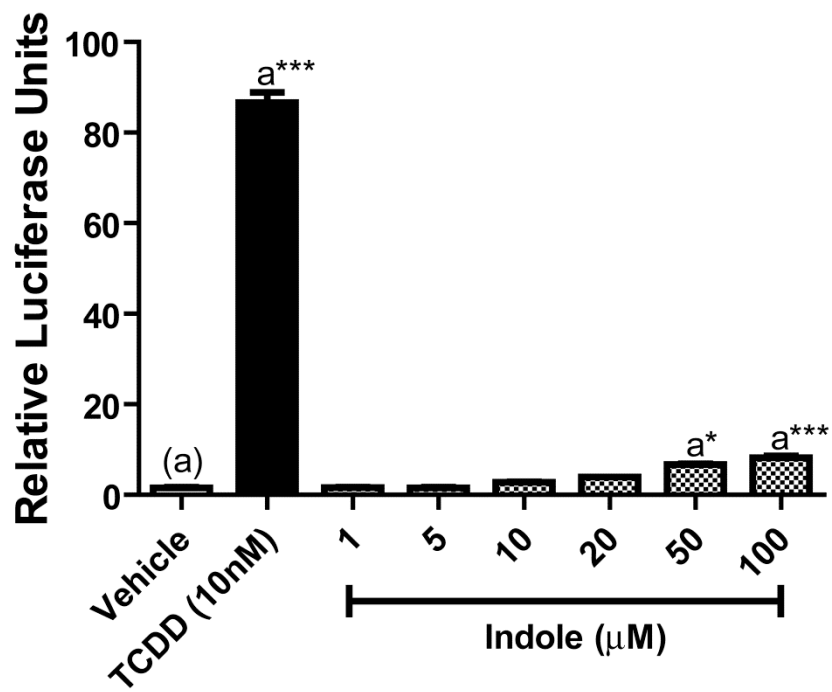

**Figure S2:** Indole marginally activates the AHR in a rat cell line. Indole dose-response assessment for AHR-dependent transcriptional activity in H4-II-E1.1(Rat) reporter cell line. The cells were treated as indicated for 4 h; followed by lysis and measurement of luciferase activity.

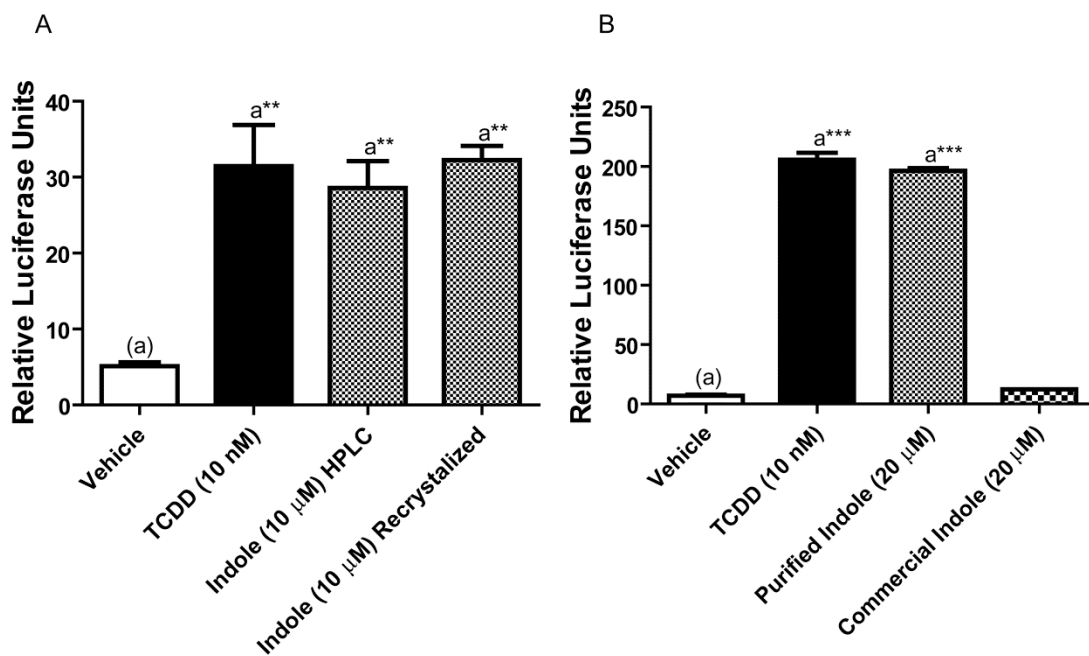

**Figure S3:** Purified indole induces AHR transcriptional activity. (A) Comparison of AHR dependent luciferase activity of recrystallized and HPLC pure indole and (B) purified indole compared with commercial indole within HepG2 (40/6) cells. Cells were treated as indicated for 4 h; followed by lysis and measurement of luciferase activity.

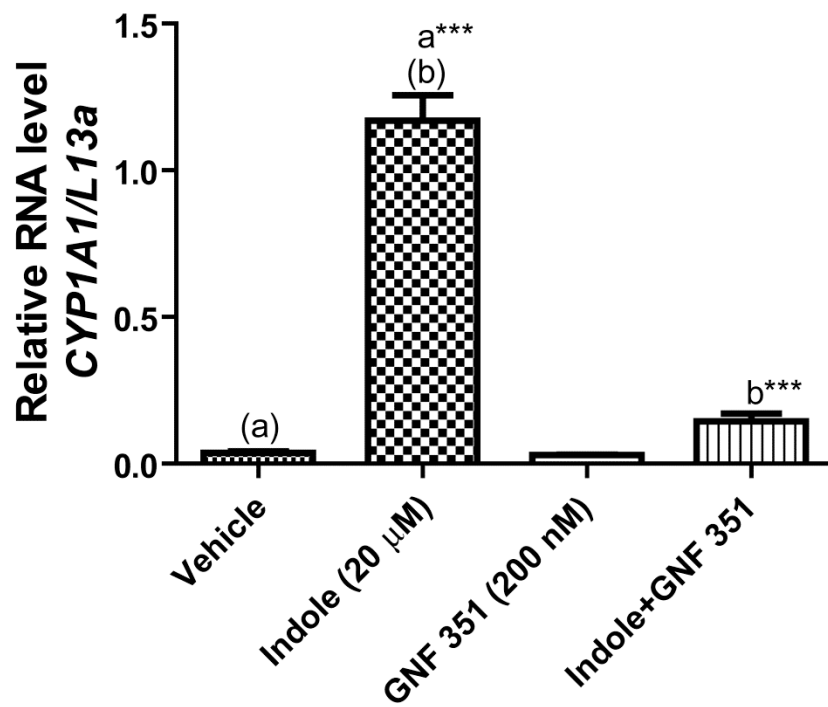

**Figure S4:** AHR antagonist GNF351 suppresses indole mediated induction of *CYP1A1* mRNA. Expression of AHR target gene *CYP1A1* within Caco2 cells was determined through qPCR analysis following 4 h of treatment with DMSO (Vehicle), TCDD (10 nM), or indole (IND) at the indicated dose with or without 1 h pretreatment with known AHR antagonist GNF351 (200 nM).

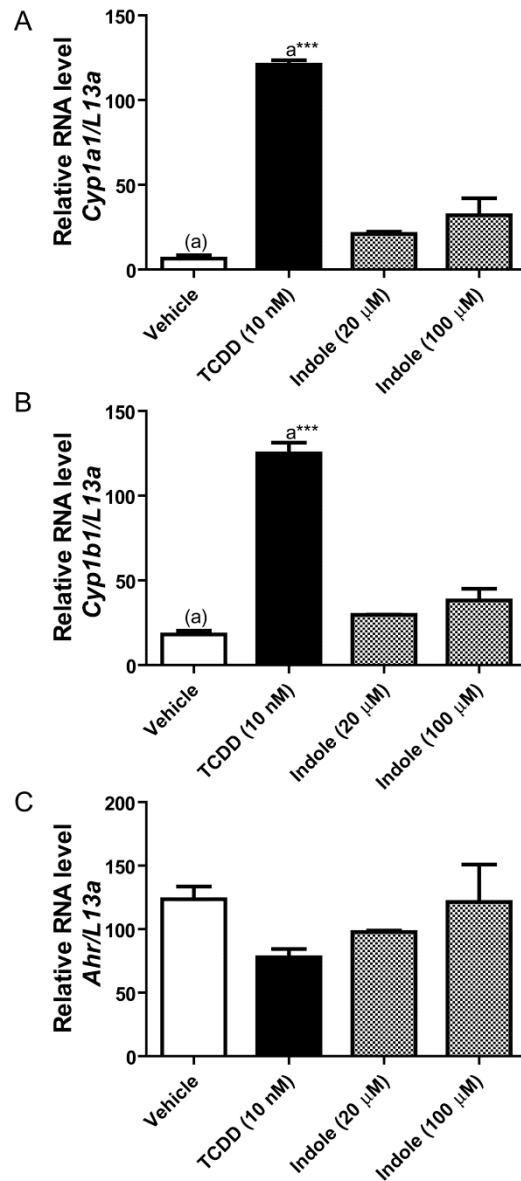

**Figure S5:** Indole fails to induce AHR target genes in mouse Hepa 1 cells. Expression of AHR-responsive (A) *Cyp1a1*, (B) *Cyp1b1*, and (C) *Ahr* within Hepa 1 cells was determined through qPCR analysis following 4 h of treatment with DMSO (Vehicle), TCDD (10 nM), or indole at the indicated dose.



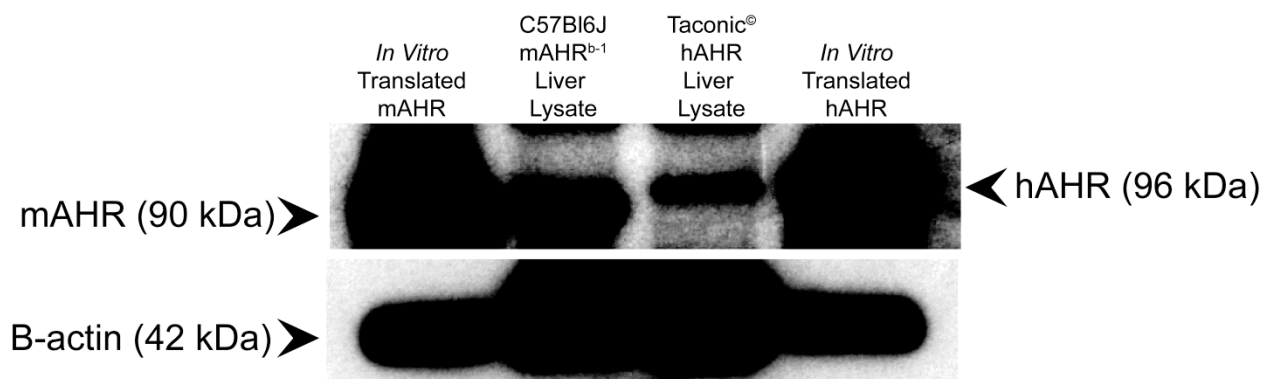

**Figure S6:** Western blot analysis of hAHR vs mAHR liver expression in C57BL/6J versus Taconic<sup>®</sup> AHR humanized mouse. Positive controls for human and mouse AHR were generated through *in vitro* translations.

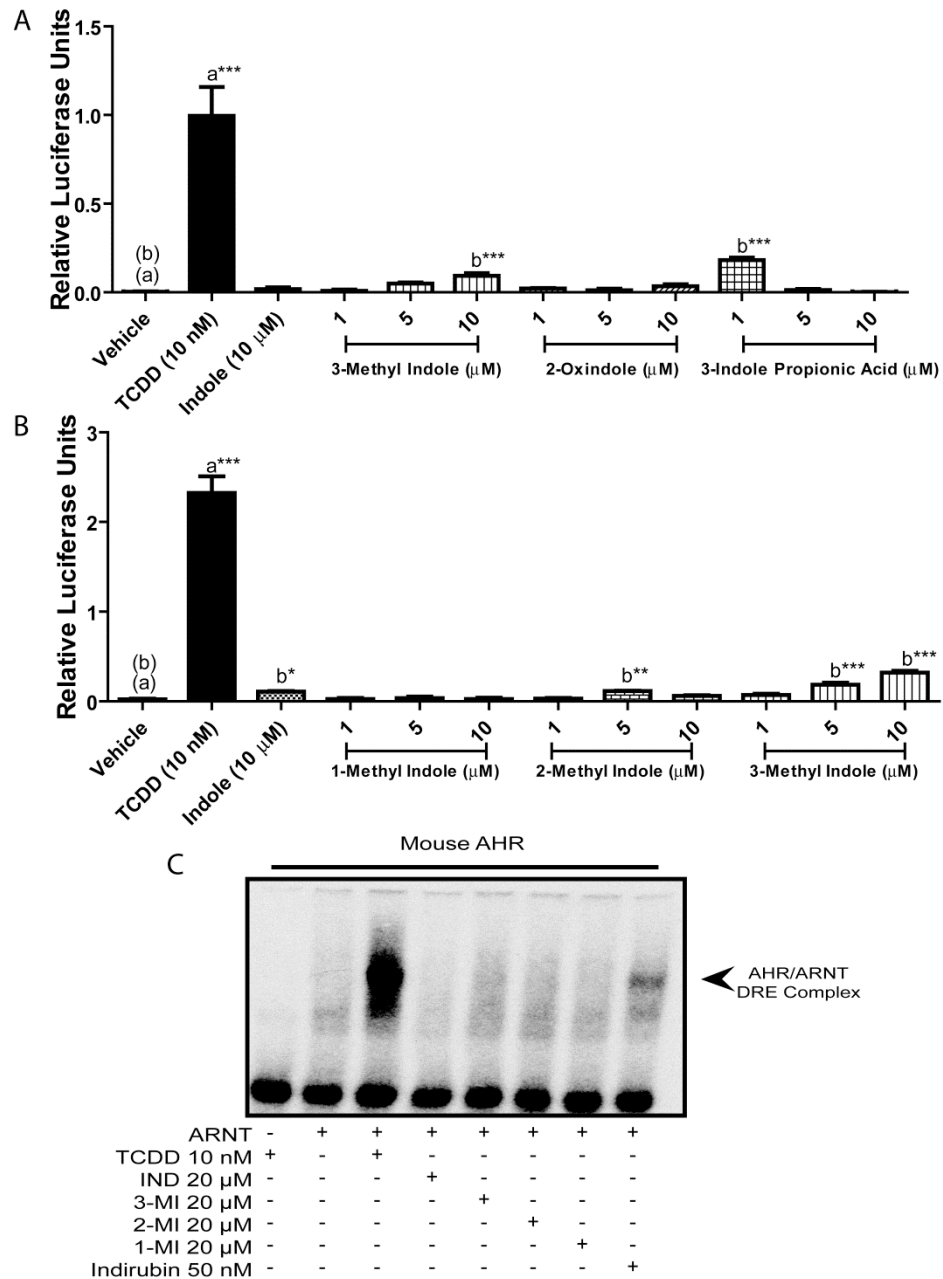

**Figure S7:** Mono-substituted indoles are poor inducers of mouse AHR transcriptional activity. (A) Hepa 1.1 reporter cells were treated as indicated for 4 h with the indicated microbial indole and (B) methyl indole derivatives, cells were lysed, and luciferase activity was measured. (C) *In vitro* translated mAHR/ARNT gel shift assay displaying treatment capacity to transform mouse AHR to AHR/ARNT/DNA complex. Indole (IND), 3-methyl indole (3-MI), 2-methyl indole (2-MI), 1-methyl indole (1-MI) and indirubin (IR).

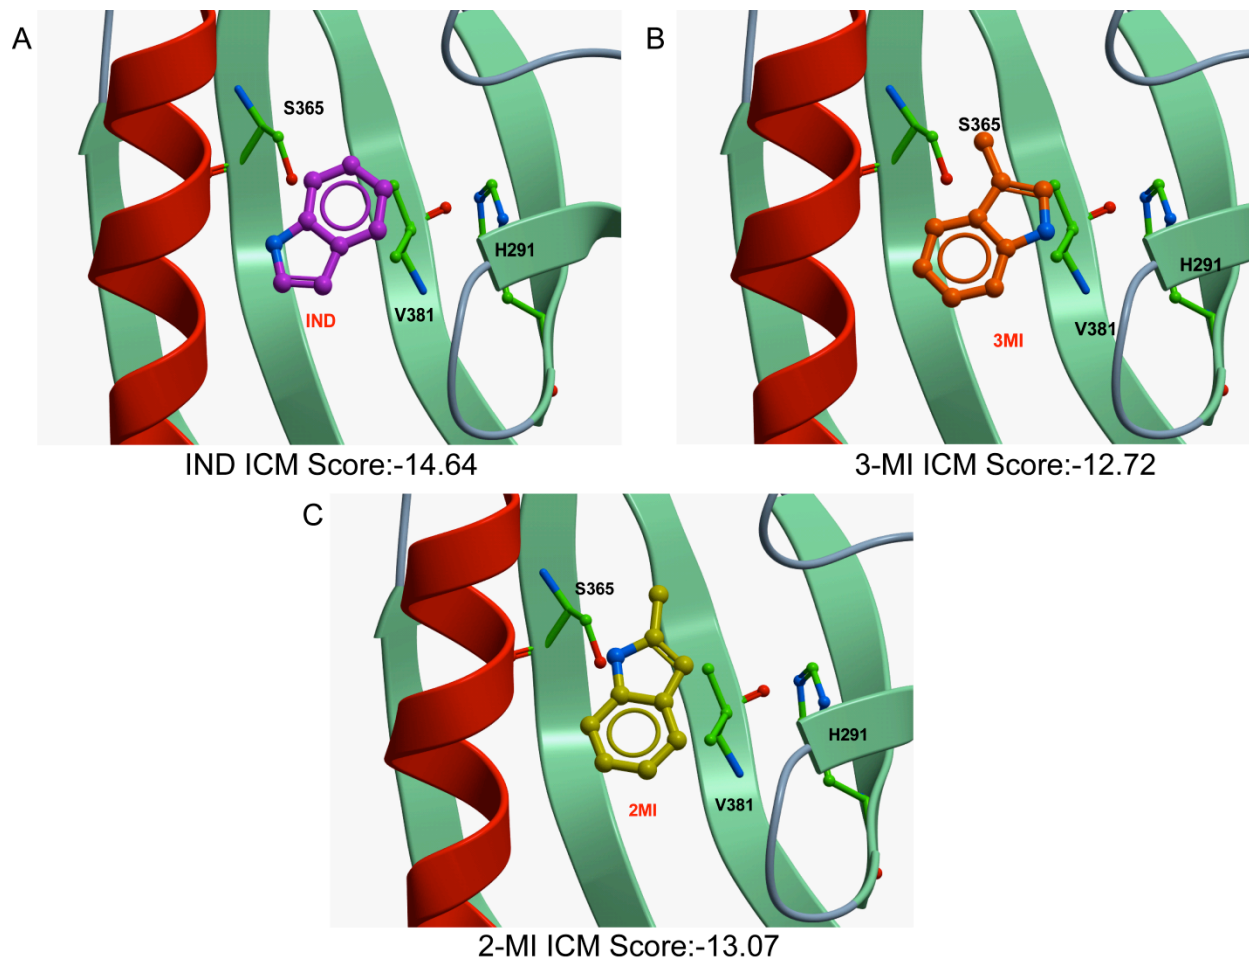

**Figure S8:** *In silico* modeling of a single indole molecule binding within hAHR ligand binding pocket. *In silico* modeling of (A) indole, (B) 3-methyl indole, or (C) 2-methyl indole binding within the human AHR ligand binding domain.

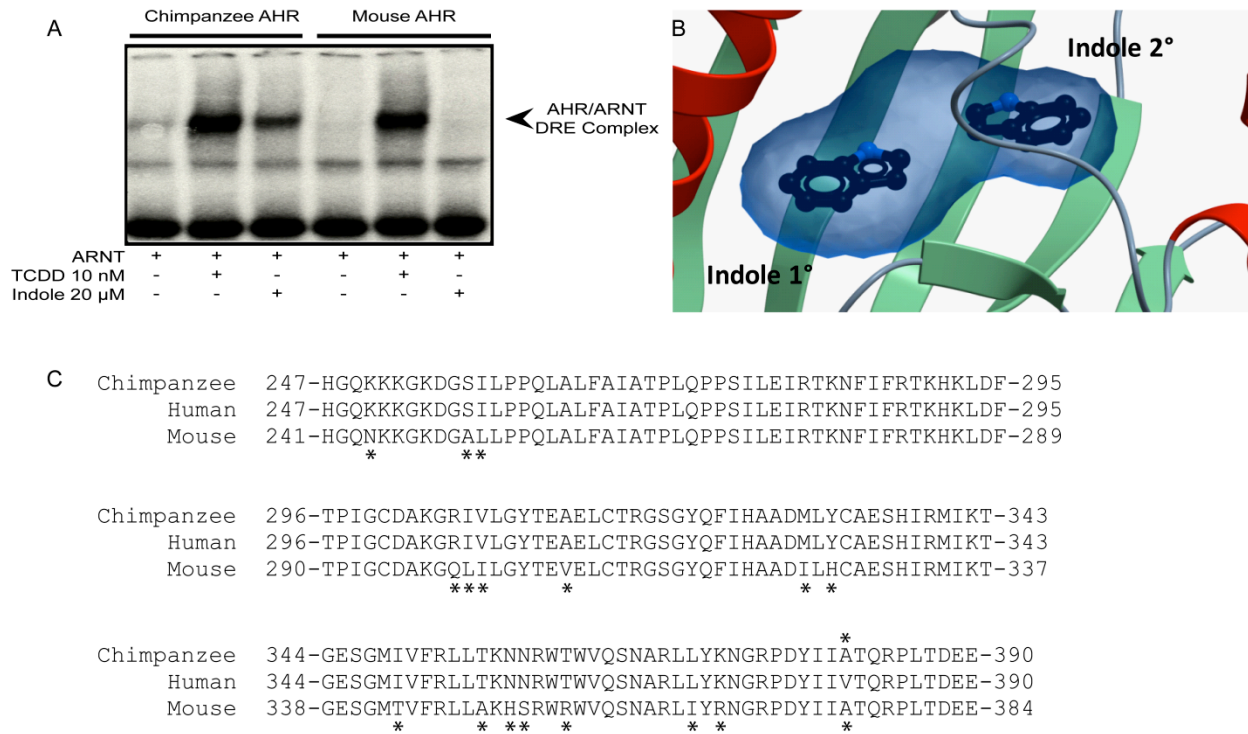

**Figure S9:** The chimpanzee AHR binds to and is activated by indole. (A) *In vitro* translated AHR/ARNT gel shift assay displaying indole capacity to transform chimpanzee AHR to AHR/ARNT/DNA complex compared to murine AHR. (B) *In silico* modeling of favorable binding of two indole molecules within the chimpanzee AHR ligand-binding domain. (C) Amino acid sequence comparison between the chimpanzee, human, and mouse AHR ligand binding domain.
